# Supplementary material for: Ap-phenylenediamine oligomer-mediated Li–O2battery with an extremely low charge potential of 3.1 V
Source: Royal Society of Chemistry journal article supplement (doi:10.1039/d0ta09627j), 2020-01-01
Supplement: d0ta09627j1.pdf [file d0ta09627j1.pdf]

## Supporting Information

### **A *p*-Phenylenediamine Oligomer-Mediated Li–O<sub>2</sub> Battery with an Extremely Low Charge Potential of 3.1 V**

Junkai Wang<sup>1</sup>, Deqing Li<sup>2</sup>, Zhongjun Chen<sup>3</sup>, Zhonghua Wu<sup>3</sup>, Bozhen Chen<sup>2\*</sup>, and Xiangfeng  
Liu<sup>1\*</sup>

<sup>1</sup> Center of Materials Science and Optoelectronics Engineering, College of Materials Science and  
Optoelectronic Technology, University of Chinese Academy of Sciences, Beijing 100049, P. R.  
China

<sup>2</sup> School of Chemical Sciences, University of Chinese Academy of Sciences, Beijing 100049,  
P. R. China

<sup>3</sup> Beijing Synchrotron Radiation Facility, Institute of High Energy Physics, Chinese Academy of  
Sciences, Beijing 100049, P. R. China

\*Correspondence to: [liuxf@ucas.ac.cn](mailto:liuxf@ucas.ac.cn) (X.L.);

[bozhenchen@hotmail.com](mailto:bozhenchen@hotmail.com) (B.C.)

**Table S1. Comparison of the charge potential and overpotential of Li–O<sub>2</sub> batteries with the addition of various RMs.**

| NO.       | Redox mediator    | Charging voltage (V) | Overpotential (V) | Reference        |
|-----------|-------------------|----------------------|-------------------|------------------|
| 1         | LiI               | 3.5                  | 0.8               | 1                |
| 2         | LiBr              | 3.5                  | 0.8               | 2                |
| 3         | MoCl <sub>5</sub> | 3.6                  | 0.9               | 3                |
| 4         | TDPA              | 3.5                  | 0.8               | 4                |
| 5         | TTF               | 3.43                 | 0.8               | 5                |
| 6         | DBBQ              | 3.75                 | 1.0               | 6                |
| 7         | TEMPO             | 3.6                  | 0.7               | 7                |
| 8         | AZADO             | 3.6                  | 0.9               | 8                |
| 9         | Vitamin K         | 3.5                  | 0.8               | 9                |
| <b>10</b> | <b>pPO</b>        | <b>3.1</b>           | <b>0.4</b>        | <b>This work</b> |

**Table 1:** shows the charge potential and overpotential of typical RM-mediated Li–O<sub>2</sub> batteries reported in the literature. In contrast, the Li–O<sub>2</sub> battery mediated by pPO shows the lowest charge potential.

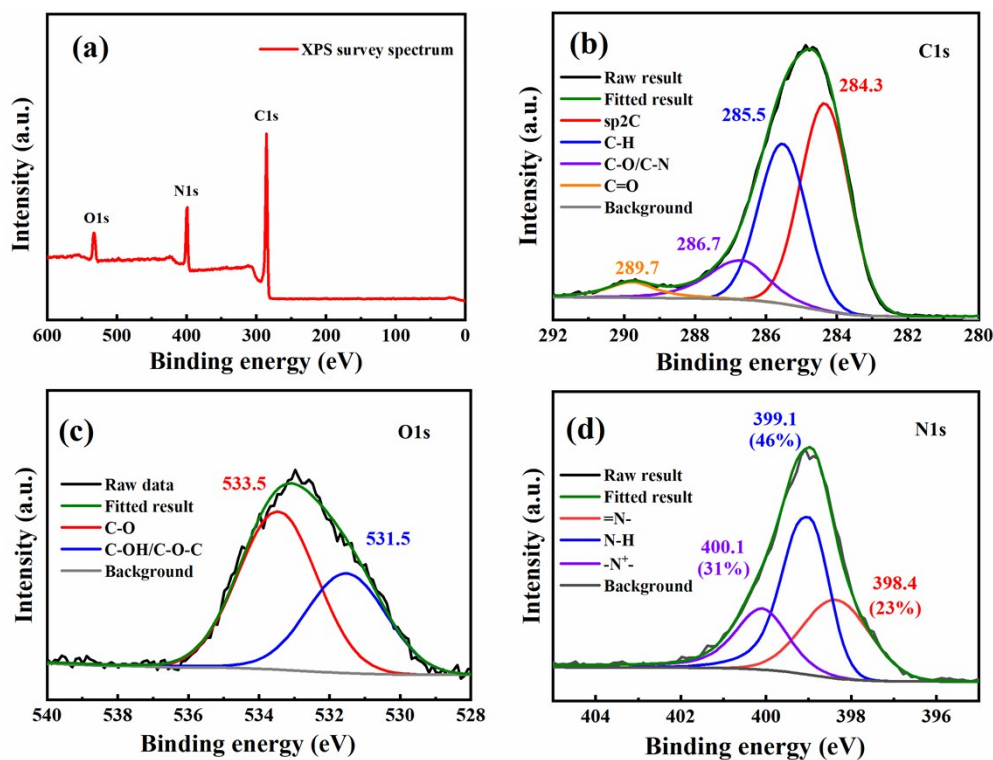

**Fig. S1** Characterization of the molecular structure of pPO. X-ray photoelectron spectroscopy of pPO indicates the existence of various functional groups. **a** XPS total spectrum, and **b** C 1s, **c** O 1s and **d** N 1s XPS spectra.

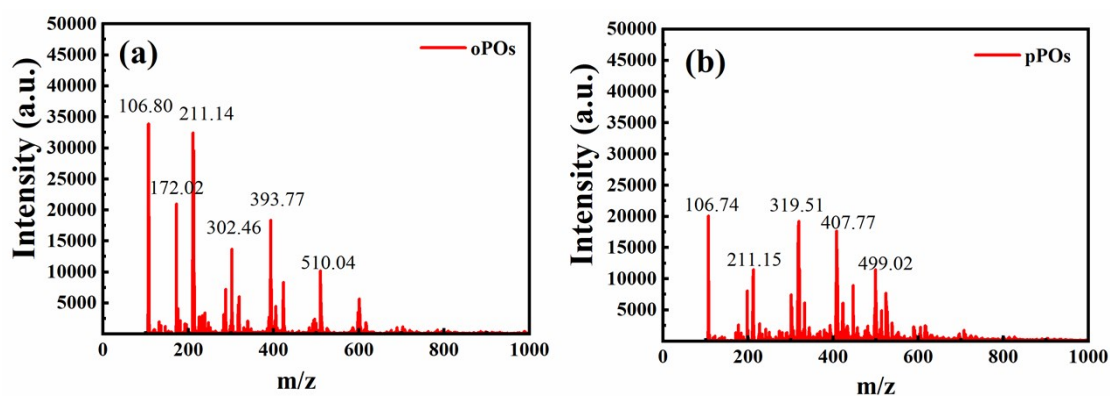

**Fig. S2:** TOF-MS of oPO and pPO show that the main components of the phenylenediamine oligomers are dimers and trimers. **a** TOF mass spectrum of oPO. **b** TOF mass spectrum of mPO.

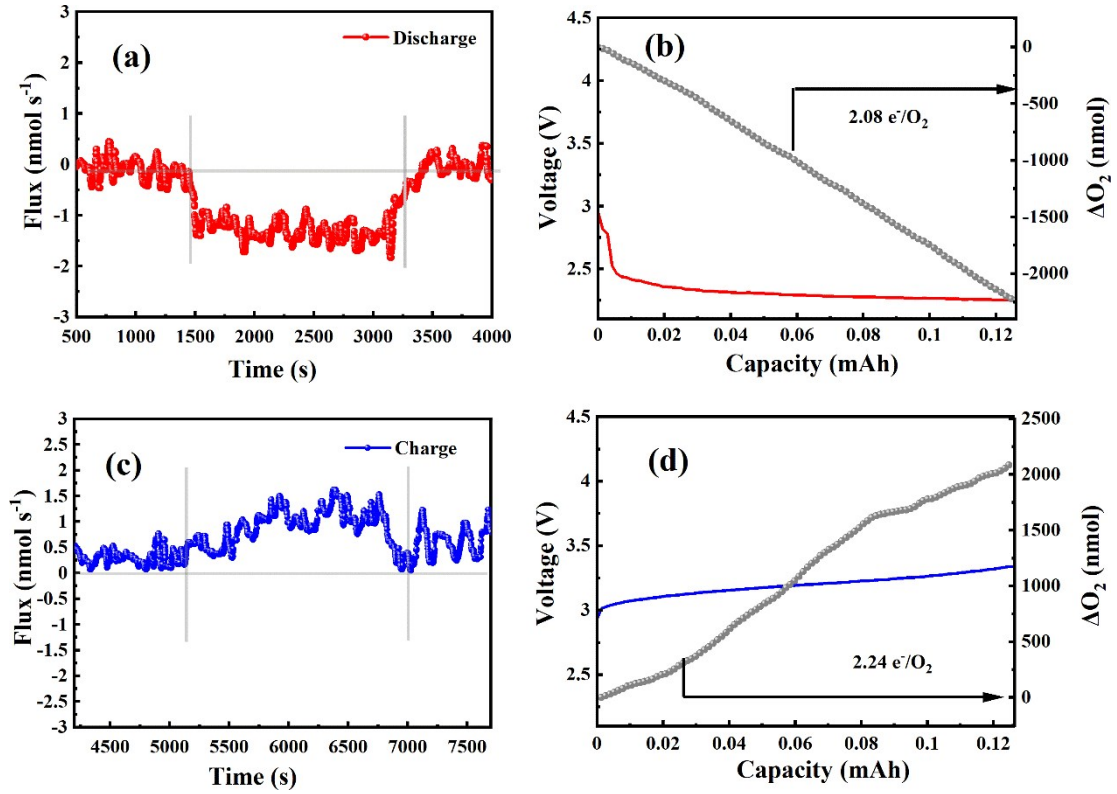

**Fig. S3:** The DEMS data indicate that the number of transferred electrons in the discharge and charge process is  $2.22 e^-/O_2$  and  $2.60 e^-/O_2$ . **a, b** Oxygen absorption during the discharge process and the corresponding discharge curve. **c, d** Oxygen evolution during the charging process and the corresponding charge curve.

**Table 2: DEMS data of Li-O<sub>2</sub> cells with and without pPO.**

|           | $\Delta Q (e^-)$      | $\Delta O_2 (nmol)$ | $n (e^-/O_2)$ |
|-----------|-----------------------|---------------------|---------------|
| Discharge | $4.66 \times 10^{-6}$ | 2287.31             | 2.03          |
| Charge    | $4.66 \times 10^{-6}$ | 2083.53             | 2.24          |

$\Delta O_2$ : The amount of substance that releases oxygen;

$\Delta Q$ : Total number of electrons;

$n$ : Number of electrons transferred,  $n = \Delta Q / \Delta O_2$ .

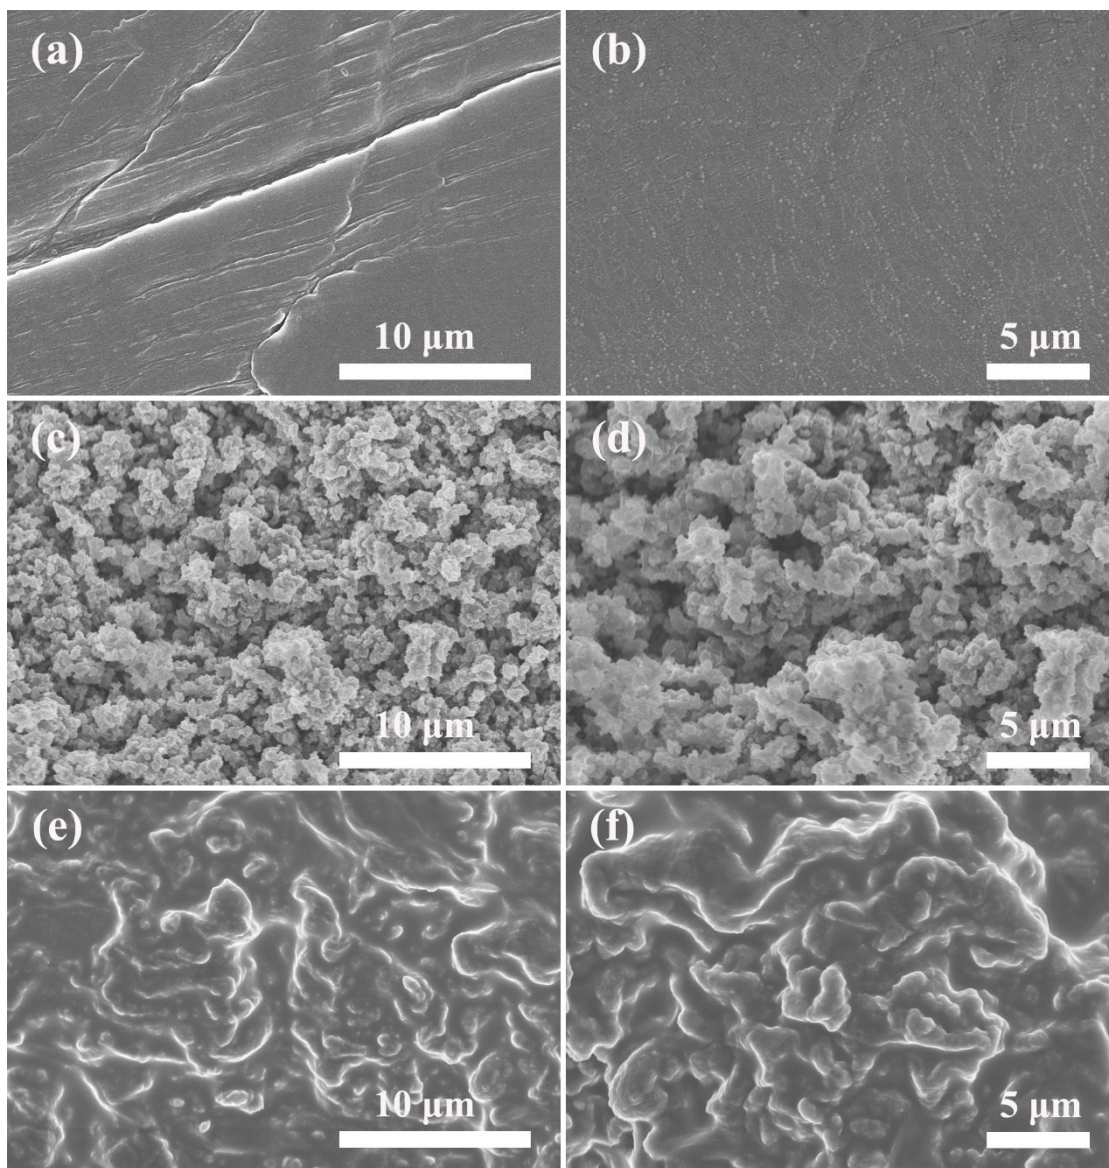

**Fig. S4:** SEM images of a lithium foil showing that pPO protects the foil, which can prevent its pulverization and failure. Lithium foil was cycled 120h at 200 mA g<sup>-1</sup> current density in a battery, and then taken out and dried to observe with an electron microscope. **a, b** Before the cycle and after 120 h; **c, d** TEGDME without pPO; **e, f** TEGDME containing pPO.



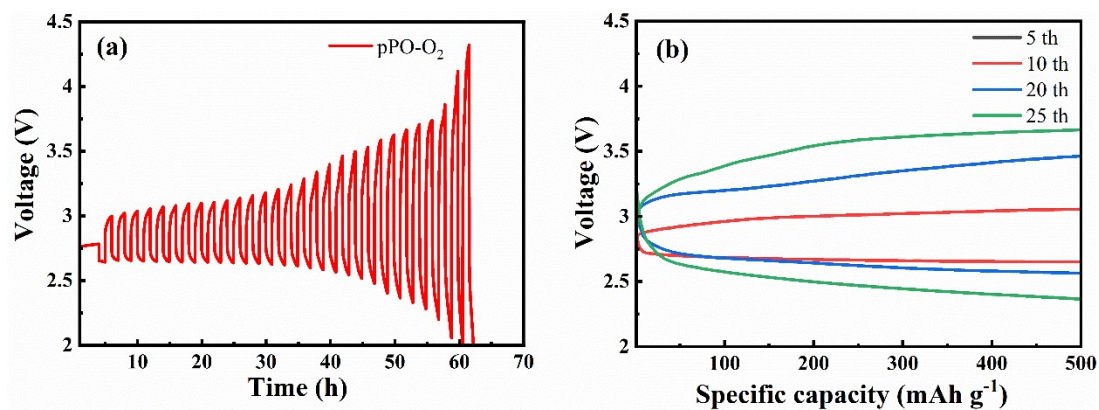

**Fig. S5:** The cycle performance of lithium oxygen battery with pPO added in oxygen atmosphere. **a** Voltage–time plot. **b** Charge–discharge curves of different cycles (5th, 10th, 20th, 25th).

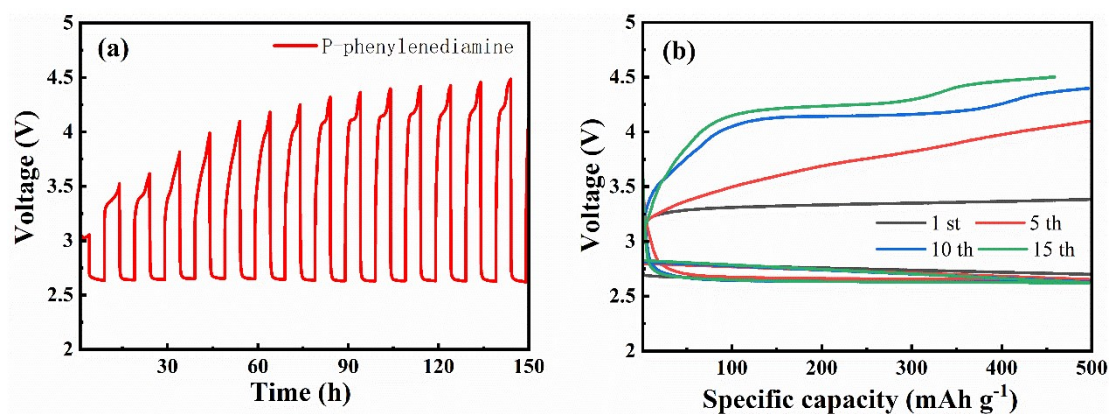

**Fig. S6:** The cycle performance of lithium oxygen battery with P-phenylenediamine added in oxygen atmosphere. **a** Voltage–time plot. **b** Charge–discharge curves of different cycles (1st, 5th, 10th, 15th).

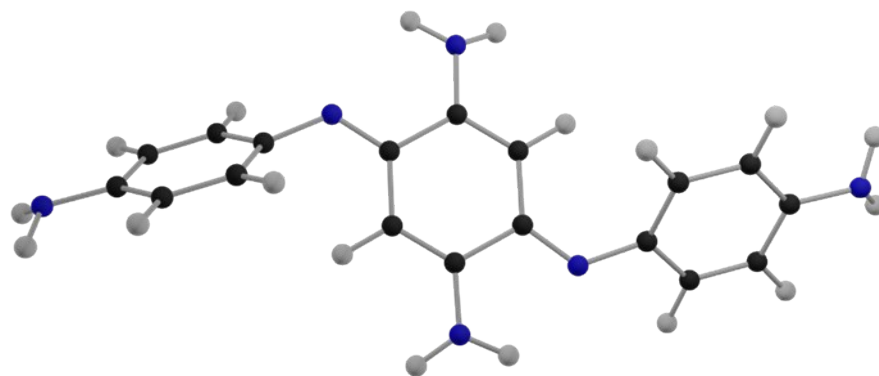

**Fig. S7:** Molecular structure of pPO after optimization.

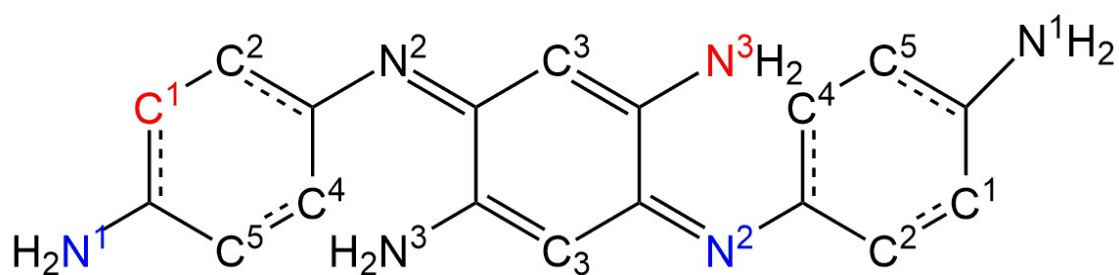

Fig. S8: The lithium adsorption sites in pPO.

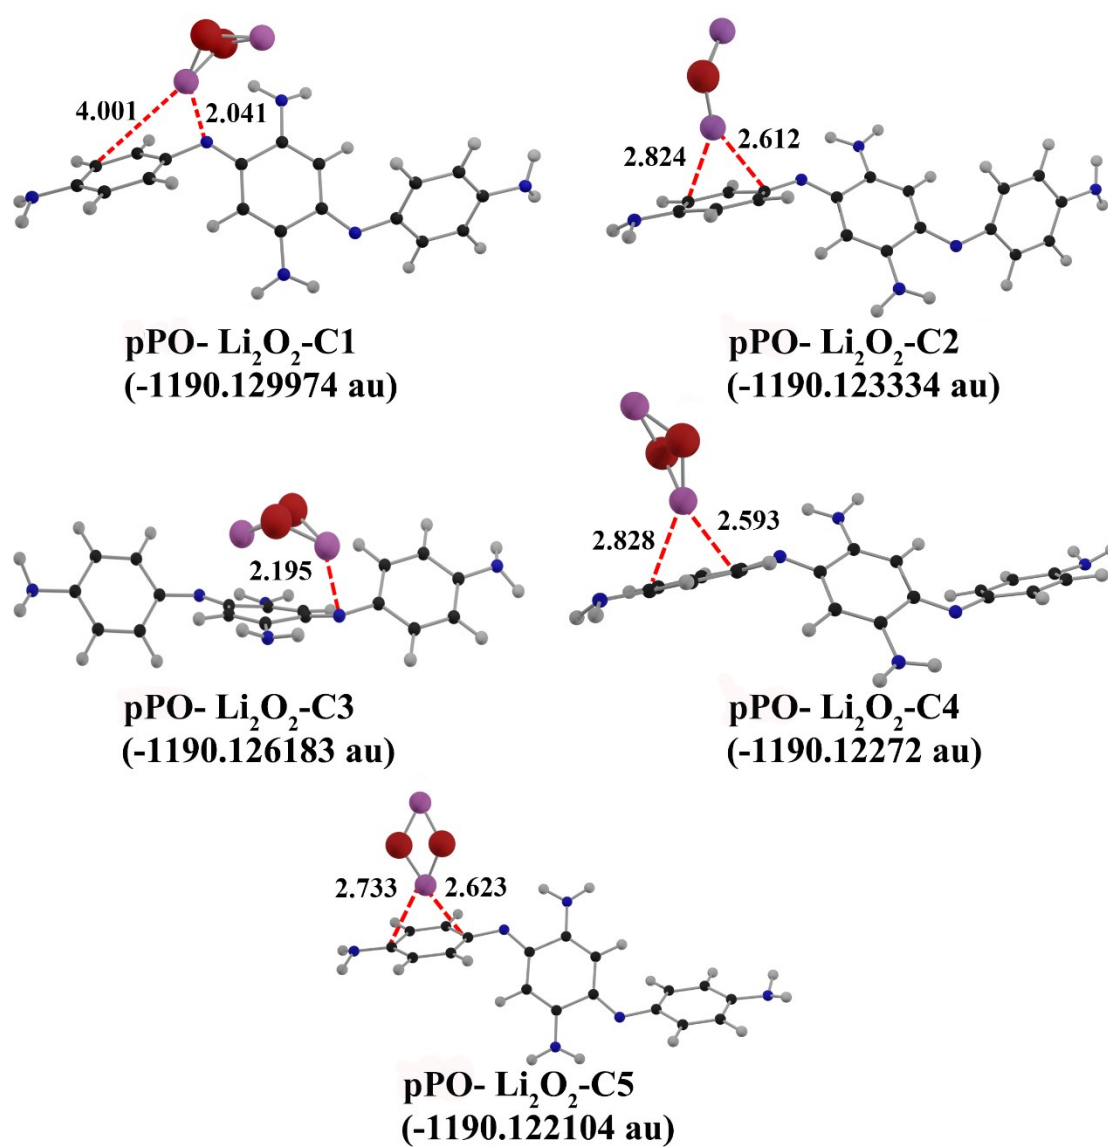

**Fig. S9:** The structure of the complex after optimization with C as the adsorption site. The total Gibbs free energy of the complex after solvent correction is shown in parentheses.



**Table 3:** Comparison of bond energy and free energy of reaction with Li<sub>2</sub>O<sub>2</sub> at different reaction sites

| Adsorption Site (*) |          | Å     | Gibbs free energy (kcal mol <sup>-1</sup> ) |
|---------------------|----------|-------|---------------------------------------------|
| pPO                 | N-O band | 1.996 | -7.2                                        |
| TEMPO               | O-O band | 1.937 | -5.2                                        |

Cartesian coordinates of the calculated species

Li<sub>2</sub>O<sub>2</sub>

0 1

|    |             |             |             |
|----|-------------|-------------|-------------|
| Li | -0.70477000 | 1.37462700  | 0.00154300  |
| O  | -0.70477000 | -0.36110500 | -0.00057900 |
| O  | 0.70477000  | 0.36110500  | -0.00057900 |
| Li | 0.70477000  | -1.37462700 | 0.00154300  |

pPO

0 1

|   |             |             |             |
|---|-------------|-------------|-------------|
| C | -4.11455400 | 0.39404000  | 0.83999300  |
| C | -5.40301100 | 0.91925200  | 0.83034600  |
| C | -6.41603400 | 0.35162900  | 0.04118300  |
| C | -6.08643500 | -0.76133700 | -0.74535800 |
| C | -4.79156100 | -1.27365500 | -0.75387400 |
| C | -3.78042100 | -0.71134000 | 0.03966200  |
| H | -3.35995600 | 0.83729300  | 1.48206400  |
| H | -5.63367400 | 1.77373700  | 1.46345100  |
| H | -6.85019700 | -1.22755300 | -1.36446300 |
| H | -4.56014300 | -2.12576400 | -1.38992000 |
| N | -7.73427000 | 0.84170100  | 0.09154600  |

|   |             |             |             |
|---|-------------|-------------|-------------|
| H | -7.79581700 | 1.82298300  | 0.33799600  |
| H | -8.27016400 | 0.65925700  | -0.74939800 |
| C | -1.27087900 | -0.60713000 | 0.04681500  |
| C | -0.11639900 | -1.35518700 | 0.35851900  |
| C | -1.13510500 | 0.73823600  | -0.31111500 |
| C | 1.13510700  | -0.73823000 | 0.31109900  |
| C | 0.11640100  | 1.35519300  | -0.35853500 |
| H | -2.01925900 | 1.30770800  | -0.58244000 |
| H | 2.01926100  | -1.30770200 | 0.58242400  |
| C | 3.78042200  | 0.71134200  | -0.03966600 |
| C | 4.11456000  | -0.39403400 | -0.84000100 |
| C | 4.79155400  | 1.27364800  | 0.75388500  |
| C | 5.40301500  | -0.91925000 | -0.83034300 |
| H | 3.35996700  | -0.83727900 | -1.48208300 |
| C | 6.08642700  | 0.76132500  | 0.74538100  |
| H | 4.56013200  | 2.12575400  | 1.38993500  |
| C | 6.41603100  | -0.35163600 | -0.04116400 |
| H | 5.63368300  | -1.77373200 | -1.46345100 |
| H | 6.85018400  | 1.22753500  | 1.36449800  |
| N | 7.73426500  | -0.84171300 | -0.09151600 |
| H | 8.27015200  | -0.65927400 | 0.74943400  |
| H | 7.79581300  | -1.82299300 | -0.33797100 |
| N | 0.27036900  | 2.73052800  | -0.65981600 |
| H | 1.03666600  | 2.88353000  | -1.31255800 |
| H | -0.57972100 | 3.14047400  | -1.03351100 |
| N | -0.27036700 | -2.73052300 | 0.65980000  |
| H | 0.57972400  | -3.14046900 | 1.03349100  |
| H | -1.03666000 | -2.88352400 | 1.31254600  |
| N | 2.50347500  | 1.30099500  | -0.08078500 |
| N | -2.50347200 | -1.30098800 | 0.08076900  |

|                                         |             |             |             |
|-----------------------------------------|-------------|-------------|-------------|
| C                                       | 1.27088100  | 0.60713600  | -0.04683100 |
| pPO- Li <sub>2</sub> O <sub>2</sub> -N1 |             |             |             |
| 0 1                                     |             |             |             |
| C                                       | 3.81825072  | -1.00488789 | 1.67039243  |
| C                                       | 5.06151972  | -1.08169289 | 1.04913043  |
| C                                       | 5.20426972  | -0.74147589 | -0.29879357 |
| C                                       | 4.07690272  | -0.30909689 | -1.00433457 |
| C                                       | 2.83409372  | -0.22083189 | -0.38415657 |
| C                                       | 2.68027672  | -0.56860489 | 0.96994643  |
| H                                       | 3.72769772  | -1.28686989 | 2.71656743  |
| H                                       | 5.92436472  | -1.41870989 | 1.61861743  |
| H                                       | 4.16971172  | -0.02989089 | -2.05133857 |
| H                                       | 1.97552572  | 0.12529111  | -0.94813157 |
| N                                       | 6.49624772  | -0.76370289 | -0.92782957 |
| H                                       | 7.10369572  | -1.46782389 | -0.51634957 |
| H                                       | 6.42685572  | -0.95771589 | -1.92363257 |
| C                                       | 0.17957272  | -0.54192289 | 1.01317043  |
| C                                       | -0.82415528 | 0.36383911  | 1.40322143  |
| C                                       | -0.11468728 | -1.52660789 | 0.05951243  |
| C                                       | -2.10378928 | 0.24934011  | 0.84029643  |
| C                                       | -1.37212728 | -1.62424389 | -0.52451257 |
| H                                       | 0.66968372  | -2.21672289 | -0.24021357 |
| H                                       | -2.88972128 | 0.91879611  | 1.17257843  |
| C                                       | -4.78876228 | -0.10059689 | -0.52655057 |
| C                                       | -4.74012528 | 1.29387911  | -0.68090357 |
| C                                       | -6.03438828 | -0.68933389 | -0.26594757 |
| C                                       | -5.89000028 | 2.06683011  | -0.55483057 |
| H                                       | -3.79582328 | 1.77323511  | -0.91617157 |

|    |             |             |             |
|----|-------------|-------------|-------------|
| C  | -7.18922128 | 0.08095511  | -0.16555157 |
| H  | -6.09853728 | -1.76695489 | -0.13667857 |
| C  | -7.13805728 | 1.47687711  | -0.29751657 |
| H  | -5.82430628 | 3.14485811  | -0.68127957 |
| H  | -8.14225428 | -0.40558089 | 0.02723843  |
| N  | -8.30554228 | 2.25210011  | -0.24248657 |
| H  | -9.05443428 | 1.83837511  | 0.29729843  |
| H  | -8.15368128 | 3.21393511  | 0.03136143  |
| N  | -1.71762928 | -2.63503889 | -1.46234757 |
| H  | -2.08714328 | -2.23581189 | -2.32259857 |
| H  | -0.92697528 | -3.22745789 | -1.68961157 |
| N  | -0.55216228 | 1.30926911  | 2.40088043  |
| H  | 0.42983972  | 1.56064911  | 2.42932143  |
| H  | -1.14742428 | 2.12652611  | 2.36501543  |
| N  | -3.64905828 | -0.90918289 | -0.70758057 |
| N  | 1.45941372  | -0.43125789 | 1.63707543  |
| C  | -2.39201228 | -0.72832889 | -0.11469357 |
| Li | 7.36071228  | 0.89625989  | -0.74999643 |
| O  | 8.77306028  | 1.80302589  | -0.19965543 |
| O  | 8.08572428  | 2.30774689  | -1.52717943 |
| Li | 8.76551628  | 3.50892089  | -0.48517943 |

pPO- Li<sub>2</sub>O<sub>2</sub>-N<sub>2</sub>

0 1

|   |             |             |             |
|---|-------------|-------------|-------------|
| C | -4.52257400 | 0.12283800  | -0.74922900 |
| C | -5.72820200 | -0.55687900 | -0.59956300 |
| C | -5.87650300 | -1.54972000 | 0.38224800  |
| C | -4.77286800 | -1.83658200 | 1.20482500  |
| C | -3.56546500 | -1.16577700 | 1.04563100  |
| C | -3.41110700 | -0.17540600 | 0.05820400  |

|   |             |             |             |
|---|-------------|-------------|-------------|
| H | -4.42188500 | 0.88184400  | -1.52146900 |
| H | -6.56736900 | -0.31136500 | -1.24575500 |
| H | -4.86997800 | -2.58655000 | 1.98626200  |
| H | -2.73179300 | -1.39534800 | 1.70157500  |
| N | -7.10470000 | -2.18641200 | 0.58238600  |
| H | -7.71197300 | -2.20478500 | -0.22562900 |
| H | -7.04769800 | -3.09356000 | 1.02486200  |
| C | -1.05738900 | 0.11759300  | -0.23607600 |
| C | 0.11208600  | 1.06131100  | -0.24423800 |
| C | -0.78384100 | -1.27265000 | -0.44398300 |
| C | 1.39103300  | 0.53732700  | -0.21587100 |
| C | 0.49494500  | -1.76729400 | -0.49305800 |
| H | -1.62511700 | -1.94945300 | -0.53867500 |
| H | 2.22986400  | 1.22438300  | -0.21037100 |
| C | 4.05279700  | -0.85678700 | -0.09532300 |
| C | 4.28135000  | 0.08758500  | 0.92749300  |
| C | 5.17196900  | -1.29315900 | -0.83189200 |
| C | 5.55524500  | 0.58507900  | 1.17669500  |
| H | 3.45553400  | 0.40533800  | 1.55479100  |
| C | 6.43973900  | -0.77679300 | -0.60458500 |
| H | 5.01660800  | -2.04108700 | -1.60340100 |
| C | 6.65664600  | 0.17614700  | 0.40645200  |
| H | 5.70468100  | 1.29528400  | 1.98683600  |
| H | 7.27999800  | -1.12464500 | -1.20098300 |
| N | 7.94407200  | 0.64475300  | 0.68730300  |
| H | 8.58864100  | 0.60503100  | -0.09071400 |
| H | 7.97633300  | 1.54405100  | 1.14841900  |
| N | 0.79684400  | -3.07254900 | -0.66107400 |
| H | 1.78457600  | -3.28719100 | -0.72884400 |
| H | 0.09311400  | -3.74904100 | -0.90180900 |

|    |             |             |             |
|----|-------------|-------------|-------------|
| N  | -0.11232300 | 2.38991600  | -0.23843100 |
| H  | -1.00138000 | 2.89982800  | -0.50133100 |
| H  | 0.71261200  | 2.97250100  | -0.22151200 |
| N  | 2.82737800  | -1.46913000 | -0.35663900 |
| N  | -2.25172000 | 0.62933200  | -0.05934800 |
| C  | 1.67051000  | -0.85901100 | -0.31495700 |
| Li | -2.96771200 | 2.47115700  | 0.22626300  |
| O  | -2.31272000 | 3.81932200  | -0.80790500 |
| O  | -2.78363600 | 4.19202100  | 0.63327100  |
| Li | -2.84595200 | 5.46408000  | -0.53666700 |

pPO- Li<sub>2</sub>O<sub>2</sub>-N3

0 1

|   |             |             |             |
|---|-------------|-------------|-------------|
| C | 4.09662800  | 0.52590500  | -0.77606300 |
| C | 5.40561800  | 0.99459900  | -0.73507700 |
| C | 6.39400000  | 0.31819200  | -0.00165600 |
| C | 6.02951400  | -0.86464500 | 0.66552800  |
| C | 4.72911100  | -1.34539900 | 0.59912900  |
| C | 3.72124900  | -0.65006800 | -0.09607800 |
| H | 3.36075200  | 1.05568200  | -1.37169900 |
| H | 5.67174200  | 1.89262500  | -1.28805400 |
| H | 6.78164500  | -1.41731800 | 1.22363300  |
| H | 4.46092600  | -2.26870400 | 1.10324200  |
| N | 7.71979900  | 0.76445400  | 0.00112100  |
| H | 7.83421600  | 1.75366200  | -0.17428100 |
| H | 8.26540900  | 0.46544400  | 0.79816000  |
| C | 1.33254100  | -0.56922900 | -0.06294200 |
| C | 0.10288800  | -1.38549900 | -0.31473300 |
| C | 1.14239800  | 0.81683200  | 0.26479300  |
| C | -1.14240200 | -0.81681900 | -0.26481800 |



|    |             |             |             |
|----|-------------|-------------|-------------|
| C  | -0.10289100 | 1.38551200  | 0.31470800  |
| H  | 2.01594700  | 1.41694500  | 0.49197100  |
| H  | -2.01595100 | -1.41693200 | -0.49199400 |
| C  | -3.72125000 | 0.65007200  | 0.09607400  |
| C  | -4.09661400 | -0.52590300 | 0.77606600  |
| C  | -4.72912400 | 1.34539400  | -0.59912400 |
| C  | -5.40560200 | -0.99460500 | 0.73509500  |
| H  | -3.36072700 | -1.05567400 | 1.37169400  |
| C  | -6.02952400 | 0.86463100  | -0.66550700 |
| H  | -4.46095000 | 2.26869900  | -1.10324300 |
| C  | -6.39399500 | -0.31820600 | 0.00168400  |
| H  | -5.67171300 | -1.89263200 | 1.28807700  |
| H  | -6.78166500 | 1.41729800  | -1.22360600 |
| N  | -7.71979200 | -0.76447700 | -0.00107800 |
| H  | -8.26541300 | -0.46547300 | -0.79811200 |
| H  | -7.83420100 | -1.75368600 | 0.17432700  |
| N  | -0.33120600 | 2.69145200  | 0.60192300  |
| H  | -1.30275900 | 2.95041900  | 0.71560700  |
| H  | 0.40166500  | 3.27652000  | 0.96500000  |
| N  | 0.33120200  | -2.69143800 | -0.60194700 |
| H  | -0.40166900 | -3.27651000 | -0.96501800 |
| H  | 1.30275500  | -2.95040600 | -0.71563300 |
| N  | -2.45185200 | 1.23234900  | 0.15815700  |
| N  | 2.45184800  | -1.23233800 | -0.15817800 |
| C  | -1.33254500 | 0.56924300  | 0.06291300  |
| Li | 0.40866150  | 4.77861611  | -3.81009926 |
| O  | -0.44164850 | 3.85361834  | -2.61255089 |
| O  | 1.01595597  | 4.34955361  | -2.24129935 |
| Li | 0.16402051  | 3.42813394  | -1.04214889 |

pPO- Li<sub>2</sub>O<sub>2</sub>-Cl

0 1

|   |             |             |             |
|---|-------------|-------------|-------------|
| C | 3.87711127  | -0.59002916 | 1.76545592  |
| C | 5.12038027  | -0.66683416 | 1.14419392  |
| C | 5.26313027  | -0.32661716 | -0.20373008 |
| C | 4.13576327  | 0.10576184  | -0.90927108 |
| C | 2.89295427  | 0.19402684  | -0.28909308 |
| C | 2.73913727  | -0.15374616 | 1.06500992  |
| H | 3.78655827  | -0.87201116 | 2.81163092  |
| H | 5.98322527  | -1.00385116 | 1.71368092  |
| H | 4.22857227  | 0.38496784  | -1.95627508 |
| H | 2.03438627  | 0.54014984  | -0.85306808 |
| N | 6.55510827  | -0.34884416 | -0.83276608 |
| H | 7.16255627  | -1.05296516 | -0.42128608 |
| H | 6.48571627  | -0.54285716 | -1.82856908 |
| C | 0.23843327  | -0.12706416 | 1.10823392  |
| C | -0.76529473 | 0.77869784  | 1.49828492  |
| C | -0.05582673 | -1.11174916 | 0.15457592  |
| C | -2.04492873 | 0.66419884  | 0.93535992  |
| C | -1.31326673 | -1.20938516 | -0.42944908 |
| H | 0.72854427  | -1.80186416 | -0.14515008 |
| H | -2.83086073 | 1.33365484  | 1.26764192  |
| C | -4.72990173 | 0.31426184  | -0.43148708 |
| C | -4.68126473 | 1.70873784  | -0.58584008 |
| C | -5.97552773 | -0.27447516 | -0.17088408 |
| C | -5.83113973 | 2.48168884  | -0.45976708 |
| H | -3.73696273 | 2.18809384  | -0.82110808 |
| C | -7.13036073 | 0.49581384  | -0.07048808 |
| H | -6.03967673 | -1.35209616 | -0.04161508 |

|    |             |             |             |
|----|-------------|-------------|-------------|
| C  | -7.07919673 | 1.89173584  | -0.20245308 |
| H  | -5.76544573 | 3.55971684  | -0.58621608 |
| H  | -8.08339373 | 0.00927784  | 0.12230192  |
| N  | -8.24668173 | 2.66695884  | -0.14742308 |
| H  | -8.99557373 | 2.25323384  | 0.39236192  |
| H  | -8.09482073 | 3.62879384  | 0.12642492  |
| N  | -1.65876873 | -2.22018016 | -1.36728408 |
| H  | -2.02828273 | -1.82095316 | -2.22753508 |
| H  | -0.86811473 | -2.81259916 | -1.59454808 |
| N  | -0.49330173 | 1.72412784  | 2.49594392  |
| H  | 0.48870027  | 1.97550784  | 2.52438492  |
| H  | -1.08856373 | 2.54138484  | 2.46007892  |
| N  | -3.59019773 | -0.49432416 | -0.61251708 |
| N  | 1.51827427  | -0.01639916 | 1.73213892  |
| C  | -2.33315173 | -0.31347016 | -0.01963008 |
| Li | 5.37518671  | 1.12908290  | 1.55572231  |
| O  | 5.95284425  | 2.58144289  | 2.37839410  |
| O  | 5.29192985  | 2.79082679  | 0.96105696  |
| Li | 5.03763234  | 4.02970937  | 2.14054960  |

pPO-Li<sub>2</sub>O<sub>2</sub> -C2

0 1

|   |            |             |             |
|---|------------|-------------|-------------|
| C | 3.87711127 | -0.59002916 | 1.76545592  |
| C | 5.12038027 | -0.66683416 | 1.14419392  |
| C | 5.26313027 | -0.32661716 | -0.20373008 |
| C | 4.13576327 | 0.10576184  | -0.90927108 |
| C | 2.89295427 | 0.19402684  | -0.28909308 |
| C | 2.73913727 | -0.15374616 | 1.06500992  |
| H | 3.78655827 | -0.87201116 | 2.81163092  |

|   |             |             |             |
|---|-------------|-------------|-------------|
| H | 5.98322527  | -1.00385116 | 1.71368092  |
| H | 4.22857227  | 0.38496784  | -1.95627508 |
| H | 2.03438627  | 0.54014984  | -0.85306808 |
| N | 6.55510827  | -0.34884416 | -0.83276608 |
| H | 7.16255627  | -1.05296516 | -0.42128608 |
| H | 6.48571627  | -0.54285716 | -1.82856908 |
| C | 0.23843327  | -0.12706416 | 1.10823392  |
| C | -0.76529473 | 0.77869784  | 1.49828492  |
| C | -0.05582673 | -1.11174916 | 0.15457592  |
| C | -2.04492873 | 0.66419884  | 0.93535992  |
| C | -1.31326673 | -1.20938516 | -0.42944908 |
| H | 0.72854427  | -1.80186416 | -0.14515008 |
| H | -2.83086073 | 1.33365484  | 1.26764192  |
| C | -4.72990173 | 0.31426184  | -0.43148708 |
| C | -4.68126473 | 1.70873784  | -0.58584008 |
| C | -5.97552773 | -0.27447516 | -0.17088408 |
| C | -5.83113973 | 2.48168884  | -0.45976708 |
| H | -3.73696273 | 2.18809384  | -0.82110808 |
| C | -7.13036073 | 0.49581384  | -0.07048808 |
| H | -6.03967673 | -1.35209616 | -0.04161508 |
| C | -7.07919673 | 1.89173584  | -0.20245308 |
| H | -5.76544573 | 3.55971684  | -0.58621608 |
| H | -8.08339373 | 0.00927784  | 0.12230192  |
| N | -8.24668173 | 2.66695884  | -0.14742308 |
| H | -8.99557373 | 2.25323384  | 0.39236192  |
| H | -8.09482073 | 3.62879384  | 0.12642492  |
| N | -1.65876873 | -2.22018016 | -1.36728408 |
| H | -2.02828273 | -1.82095316 | -2.22753508 |
| H | -0.86811473 | -2.81259916 | -1.59454808 |
| N | -0.49330173 | 1.72412784  | 2.49594392  |

|    |             |             |             |
|----|-------------|-------------|-------------|
| H  | 0.48870027  | 1.97550784  | 2.52438492  |
| H  | -1.08856373 | 2.54138484  | 2.46007892  |
| N  | -3.59019773 | -0.49432416 | -0.61251708 |
| N  | 1.51827427  | -0.01639916 | 1.73213892  |
| C  | -2.33315173 | -0.31347016 | -0.01963008 |
| Li | 3.92856260  | 1.18685816  | 1.61671239  |
| O  | 4.50622014  | 2.63921815  | 2.43938418  |
| O  | 3.84530574  | 2.84860205  | 1.02204704  |
| Li | 3.59100823  | 4.08748463  | 2.20153968  |

pPO- Li<sub>2</sub>O<sub>2</sub>-C3

|     |             |             |             |
|-----|-------------|-------------|-------------|
| 0 1 |             |             |             |
| C   | 0.00000000  | 0.00000000  | 0.00000000  |
| C   | 0.00000000  | 0.00000000  | 1.39012202  |
| C   | 1.20527540  | 0.00000000  | 2.11311078  |
| C   | 2.41217975  | 0.03684533  | 1.39070301  |
| C   | 2.40903354  | 0.07000841  | 0.00363497  |
| C   | 1.20666526  | 0.01650871  | -0.72732653 |
| H   | -0.94570361 | 0.02922580  | -0.53149659 |
| H   | -0.94542775 | 0.01136223  | 1.92724084  |
| H   | 3.35697270  | 0.05841987  | 1.92797716  |
| H   | 3.34459994  | 0.11879332  | -0.54453437 |
| N   | 1.20510051  | 0.03988323  | 3.50712597  |
| H   | 0.37361899  | -0.32647053 | 3.94966888  |
| H   | 2.04833876  | -0.30081279 | 3.94795692  |
| C   | 0.57479935  | -0.62724238 | -2.93846684 |
| C   | 0.73674787  | -0.29594436 | -4.38495238 |
| C   | -0.28630373 | -1.74642629 | -2.61353578 |
| C   | 0.17293997  | -1.09138863 | -5.34910347 |
| C   | -0.95111372 | -2.46238414 | -3.58351884 |

|    |             |             |              |
|----|-------------|-------------|--------------|
| H  | -0.44581887 | -1.98320860 | -1.56786947  |
| H  | 0.34013895  | -0.86566701 | -6.39600534  |
| C  | -0.65410849 | -3.35590257 | -7.14104381  |
| C  | 0.69255802  | -3.22105523 | -7.55438770  |
| C  | -1.57931965 | -3.85731658 | -8.07790844  |
| C  | 1.07805127  | -3.56653377 | -8.84739873  |
| H  | 1.44178399  | -2.89802611 | -6.83327457  |
| C  | -1.19991586 | -4.16287113 | -9.37691995  |
| H  | -2.61022525 | -3.98976857 | -7.76448386  |
| C  | 0.13959903  | -4.02626876 | -9.78878510  |
| H  | 2.12277014  | -3.47153341 | -9.13574000  |
| H  | -1.94021514 | -4.53308250 | -10.08197080 |
| N  | 0.53596433  | -4.40526868 | -11.06991296 |
| H  | -0.19091426 | -4.39275868 | -11.77180740 |
| H  | 1.39251103  | -3.98407384 | -11.40189025 |
| N  | -1.85099798 | -3.44301138 | -3.32639388  |
| H  | -2.05109470 | -4.04578975 | -4.11657839  |
| H  | -1.92175653 | -3.82476553 | -2.39632621  |
| N  | 1.45378569  | 0.83094688  | -4.64848158  |
| H  | 1.86054571  | 0.93875355  | -5.56451645  |
| H  | 1.97689984  | 1.18173055  | -3.85400855  |
| N  | -1.08659243 | -3.16632956 | -5.82742166  |
| N  | 1.28494871  | 0.09715099  | -2.12025244  |
| C  | -0.62278123 | -2.24326585 | -5.02724830  |
| Li | 1.89475186  | -4.99355743 | -5.72907199  |
| O  | 2.10411001  | -4.78768474 | -4.00084574  |
| O  | 2.60866715  | -3.61998023 | -4.91121613  |
| Li | 1.51876079  | -3.18202518 | -3.59348069  |

pPO- Li<sub>2</sub>O<sub>2</sub>-C4



0 1

|   |             |             |              |
|---|-------------|-------------|--------------|
| C | 0.00000000  | 0.00000000  | 0.00000000   |
| C | 0.00000000  | 0.00000000  | 1.39097402   |
| C | 1.20350196  | 0.00000000  | 2.11479361   |
| C | 2.40971852  | 0.03133432  | 1.39288801   |
| C | 2.40609621  | 0.06033771  | 0.00518240   |
| C | 1.20576119  | 0.01483393  | -0.72946653  |
| H | -0.94539233 | 0.02556994  | -0.53154390  |
| H | -0.94596056 | 0.01127363  | 1.92771211   |
| H | 3.35456209  | 0.05218405  | 1.93090807   |
| H | 3.34194907  | 0.10185857  | -0.54345288  |
| N | 1.20233865  | 0.04683395  | 3.51290151   |
| H | 0.37133065  | -0.32982794 | 3.94872384   |
| H | 2.04186353  | -0.30997063 | 3.94908599   |
| C | 0.55377261  | -0.58632508 | -2.94916867  |
| C | 0.71508180  | -0.20796944 | -4.38881039  |
| C | -0.36075162 | -1.65389915 | -2.65140916  |
| C | -0.00813756 | -0.83688457 | -5.36761331  |
| C | -1.08397073 | -2.28281405 | -3.63021114  |
| H | -0.46223632 | -1.97271350 | -1.62044283  |
| H | 0.09334832  | -0.51807182 | -6.39857958  |
| C | -1.57463030 | -2.50562896 | -7.28955553  |
| C | -0.36885961 | -2.49079623 | -8.01900840  |
| C | -2.77495617 | -2.55113771 | -8.02421852  |
| C | -0.36884411 | -2.49080348 | -9.40998280  |
| H | 0.57652621  | -2.51636058 | -7.48745236  |
| C | -2.77856137 | -2.52214159 | -9.41192387  |
| H | -3.71081539 | -2.59265616 | -7.47559377  |
| C | -1.57233684 | -2.49080958 | -10.13381514 |

|    |             |             |              |
|----|-------------|-------------|--------------|
| H  | 0.57712350  | -2.50207771 | -9.94670885  |
| H  | -3.72339936 | -2.54299508 | -9.94995519  |
| N  | -1.57115726 | -2.53765024 | -11.53192375 |
| H  | -2.41067740 | -2.18084883 | -11.96812045 |
| H  | -0.74014468 | -2.16098844 | -11.96773879 |
| N  | -1.97094699 | -3.28220485 | -3.39656480  |
| H  | -2.34972382 | -3.73162962 | -4.22024477  |
| H  | -2.01642931 | -3.73345639 | -2.49905003  |
| N  | 1.60205763  | 0.79141978  | -4.62245730  |
| H  | 1.64754657  | 1.24266868  | -5.51997325  |
| H  | 1.98083405  | 1.24084671  | -3.79877773  |
| N  | -1.65910969 | -2.59380075 | -5.89694609  |
| N  | 1.29022441  | 0.10301491  | -2.12207693  |
| C  | -0.92266493 | -1.90445596 | -5.06985358  |
| Li | 1.60873054  | -6.63105008 | -7.81014753  |
| O  | 1.62400032  | -5.08241231 | -7.05068050  |
| O  | 1.68066770  | -5.08621003 | -8.61814542  |
| Li | 0.92614848  | -3.65796116 | -7.82367060  |

pPO- Li<sub>2</sub>O<sub>2</sub>-C5

0 1

|   |             |            |             |
|---|-------------|------------|-------------|
| C | 0.00000000  | 0.00000000 | 0.00000000  |
| C | 0.00000000  | 0.00000000 | 1.39097402  |
| C | 1.20350196  | 0.00000000 | 2.11479361  |
| C | 2.40971852  | 0.03133432 | 1.39288801  |
| C | 2.40609621  | 0.06033771 | 0.00518240  |
| C | 1.20576119  | 0.01483393 | -0.72946653 |
| H | -0.94539233 | 0.02556994 | -0.53154390 |
| H | -0.94596056 | 0.01127363 | 1.92771211  |

|   |             |             |              |
|---|-------------|-------------|--------------|
| H | 3.35456209  | 0.05218405  | 1.93090807   |
| H | 3.34194907  | 0.10185857  | -0.54345288  |
| N | 1.20233865  | 0.04683395  | 3.51290151   |
| H | 0.37133065  | -0.32982794 | 3.94872384   |
| H | 2.04186353  | -0.30997063 | 3.94908599   |
| C | 0.55377261  | -0.58632508 | -2.94916867  |
| C | 0.71508180  | -0.20796944 | -4.38881039  |
| C | -0.36075162 | -1.65389915 | -2.65140916  |
| C | -0.00813756 | -0.83688457 | -5.36761331  |
| C | -1.08397073 | -2.28281405 | -3.63021114  |
| H | -0.46223632 | -1.97271350 | -1.62044283  |
| H | 0.09334832  | -0.51807182 | -6.39857958  |
| C | -1.57463030 | -2.50562896 | -7.28955553  |
| C | -0.36885961 | -2.49079623 | -8.01900840  |
| C | -2.77495617 | -2.55113771 | -8.02421852  |
| C | -0.36884411 | -2.49080348 | -9.40998280  |
| H | 0.57652621  | -2.51636058 | -7.48745236  |
| C | -2.77856137 | -2.52214159 | -9.41192387  |
| H | -3.71081539 | -2.59265616 | -7.47559377  |
| C | -1.57233684 | -2.49080958 | -10.13381514 |
| H | 0.57712350  | -2.50207771 | -9.94670885  |
| H | -3.72339936 | -2.54299508 | -9.94995519  |
| N | -1.57115726 | -2.53765024 | -11.53192375 |
| H | -2.41067740 | -2.18084883 | -11.96812045 |
| H | -0.74014468 | -2.16098844 | -11.96773879 |
| N | -1.97094699 | -3.28220485 | -3.39656480  |
| H | -2.34972382 | -3.73162962 | -4.22024477  |
| H | -2.01642931 | -3.73345639 | -2.49905003  |
| N | 1.60205763  | 0.79141978  | -4.62245730  |
| H | 1.64754657  | 1.24266868  | -5.51997325  |

|    |             |             |              |
|----|-------------|-------------|--------------|
| H  | 1.98083405  | 1.24084671  | -3.79877773  |
| N  | -1.65910969 | -2.59380075 | -5.89694609  |
| N  | 1.29022441  | 0.10301491  | -2.12207693  |
| C  | -0.92266493 | -1.90445596 | -5.06985358  |
| Li | 1.53207970  | -6.99676103 | -9.57117207  |
| O  | 1.54734949  | -5.44812325 | -8.81170503  |
| O  | 1.60401687  | -5.45192098 | -10.37916995 |
| Li | 0.84949764  | -4.02367211 | -9.58469513  |

TEMPO

0 2

|   |             |             |             |
|---|-------------|-------------|-------------|
| C | 0.00000000  | 0.00000000  | 0.00000000  |
| C | 0.00000000  | 0.00000000  | 1.54000000  |
| H | 1.00880579  | 0.00000000  | 1.89666635  |
| H | -0.50440312 | 0.87365131  | 1.89666635  |
| H | -0.50440269 | -0.87365135 | 1.89666686  |
| C | 0.72650209  | 1.25709334  | -0.51333327 |
| H | 0.22232115  | 2.13096073  | -0.15688221 |
| H | 1.73523143  | 1.25679249  | -0.15645089 |
| H | 0.72673090  | 1.25696140  | -1.58333324 |
| C | -1.90068475 | -0.87602799 | -1.20778686 |
| C | -3.11235035 | -1.43340318 | -0.43785220 |
| H | -3.68193478 | -0.62265979 | -0.03391068 |
| H | -3.72613813 | -2.00378510 | -1.10330619 |
| H | -2.77084931 | -2.06103168 | 0.35861469  |
| C | -2.38551018 | -0.17708689 | -2.49154137 |
| H | -3.00268729 | -0.84810636 | -3.05165321 |
| H | -2.94992971 | 0.69408122  | -2.23193258 |
| H | -1.54077257 | 0.10839218  | -3.08299726 |
| C | 0.76133457  | -1.09710113 | -0.40244318 |

|   |             |             |             |
|---|-------------|-------------|-------------|
| H | 1.09922913  | -1.58210009 | 0.48946672  |
| H | 1.60251026  | -0.70940349 | -0.93818006 |
| C | 0.19165047  | -2.08436193 | -1.20696016 |
| H | 0.27671358  | -3.00666132 | -0.67121013 |
| H | 0.78078791  | -2.13428077 | -2.09877023 |
| C | -1.13926866 | -1.97389862 | -1.60945272 |
| H | -1.13924911 | -1.97524942 | -2.67945187 |
| H | -1.64369391 | -2.84708985 | -1.25169269 |
| N | -1.33134298 | 0.11079543  | -0.40307170 |
| O | -2.13348946 | 1.26727980  | 0.02119816  |

TEMPO- Li<sub>2</sub>O<sub>2</sub>

0 2

|   |             |             |             |
|---|-------------|-------------|-------------|
| C | -1.32567390 | -0.06971609 | -0.08070707 |
| C | -1.75644390 | -0.18285209 | 1.39733993  |
| H | -2.79540190 | 0.14688891  | 1.51165393  |
| H | -1.68334790 | -1.22525309 | 1.71989893  |
| H | -1.13598590 | 0.42777591  | 2.06017393  |
| C | -2.33486690 | -0.82602409 | -0.96043007 |
| H | -2.41990690 | -1.86721409 | -0.64436007 |
| H | -3.31808590 | -0.34800009 | -0.88620807 |
| H | -2.02093590 | -0.81038309 | -2.00957407 |
| C | 1.33710310  | -0.06970809 | -0.08070407 |
| C | 1.76787110  | -0.18285009 | 1.39733993  |
| H | 1.69477910  | -1.22525209 | 1.71989593  |
| H | 2.80682710  | 0.14689891  | 1.51166193  |
| H | 1.14740510  | 0.42777091  | 2.06017393  |
| C | 2.34629710  | -0.82601009 | -0.96043507 |
| H | 3.32951810  | -0.34799309 | -0.88620307 |

|    |             |             |             |
|----|-------------|-------------|-------------|
| H  | 2.43133110  | -1.86720509 | -0.64437807 |
| H  | 2.03236810  | -0.81035409 | -2.00957907 |
| C  | -1.24163890 | 1.40150991  | -0.53707307 |
| H  | -2.15577490 | 1.91260191  | -0.21059107 |
| H  | -1.24140890 | 1.43116591  | -1.63545507 |
| C  | 0.00570210  | 2.12972291  | -0.03246107 |
| H  | 0.00569910  | 2.19004991  | 1.06322993  |
| H  | 0.00570910  | 3.16422591  | -0.39696207 |
| C  | 1.25305310  | 1.40151191  | -0.53706707 |
| H  | 1.25281910  | 1.43116691  | -1.63545007 |
| H  | 2.16718110  | 1.91262091  | -0.21058907 |
| N  | 0.00571510  | -0.74340709 | -0.25780907 |
| O  | 0.00571710  | -2.02013709 | -0.10689407 |
| Li | 0.21645438  | -0.75270764 | -2.18630653 |
| O  | 1.15032607  | -0.77044035 | -3.69394081 |
| O  | -0.39720359 | -0.84452040 | -3.88464801 |
| Li | 0.59557225  | -1.73018770 | -5.02019623 |



## REFERENCES

1. H.-D. Lim, H. Song, J. Kim, H. Gwon, Y. Bae, K.-Y. Park, J. Hong, H. Kim, T. Kim, Y. H. Kim, X. Lepró, R. Ovalle-Robles, R. H. Baughman and K. Kang, *Angew. Chem., Int. Ed.*, 2014, **53**, 3926-3931.
2. W.-J. Kwak, D. Hirshberg, D. Sharon, M. Afri, A. A. Frimer, H.-G. Jung, D. Aurbach and Y.-K. Sun, *Energy Environ. Sci.*, 2016, **9**, 2334-2345.
3. X.-G. Wang, Z. Zhang, Q. Zhang, C. Wang, X. Zhang, Z. Xie and Z. Zhou, *J. Mater. Chem. A*, 2019, **7**, 14239-14243.
4. D. Kundu, R. Black, B. Adams and L. F. Nazar, *ACS Central Science*, 2015, **1**, 510-515.
5. Y. Chen, S. A. Freunberger, Z. Peng, O. Fontaine and P. G. Bruce, *Nat. Chem.*, 2013, **5**, 489-494.
6. X. Gao, Y. Chen, L. Johnson and Peter G. Bruce, *Nat. Mater.*, 2016, **15**, 882-888.
7. J. Zhang, B. Sun, Y. Zhao, A. Tkacheva, Z. Liu, K. Yan, X. Guo, A. M. McDonagh, D. Shanmukaraj, C. Wang, T. Rojo, M. Armand, Z. Peng and G. Wang, *Nat. Commun.*, 2019, **10**, 602.
8. B. J. Bergner, C. Hofmann, A. Schürmann, D. Schröder, K. Peppler, P. R. Schreiner and J. Janek, *Phys. Chem. Chem. Phys.*, 2015, **17**, 31769-31779.
9. Y. Ko, H. Park, J. Kim, H.-D. Lim, B. Lee, G. Kwon, S. Lee, Y. Bae, S. K. Park and K. Kang, *Adv. Funct. Mater.*, 2019, **29**.
